# Supplementary material for: UHPLC-PAD Protocol for the Simultaneous Identification of Polyphenols and Bitter Acids: Organoleptic and Nutraceutical Fingerprinting of Bergamot-Flavored Craft Beer
Source: MDPI journal article supplement (doi:10.3390/foods13081149), 2024-04-10
Supplement: s1 [file s1]

**Table S1** Validation parameters values determined for the polyphenols.

| Compounds             | Linear range (ppm) | Regression equation             | R <sup>2</sup> | LOD (ppm) | LOQ (ppm) | Repeatability (CV %) | Reproducibility (CV %) |
|-----------------------|--------------------|---------------------------------|----------------|-----------|-----------|----------------------|------------------------|
| Gallic acid           | 0.5-100            | $y = 58838.4809x - 34304.6944$  | 0.9996         | 0.065     | 0.218     | 5.16                 | 5.19                   |
| Protocatechuic acid   | 0.5-100            | $y = 56968.3550x + 10041.8594$  | 0.9996         | 0.079     | 0.264     | 5.57                 | 4.19                   |
| 4-Hydroxybenzoic acid | 0.5-100            | $y = 66976.5781x + 8811.2215$   | 0.9996         | 0.047     | 0.156     | 3.46                 | 3.42                   |
| Vanillic acid         | 0.5-100            | $y = 39046.0740x - 17589.1592$  | 0.9998         | 0.076     | 0.254     | 5.69                 | 6.00                   |
| Caffeic acid          | 0.5-100            | $y = 80.403.9809x - 5.618.2263$ | 0.9998         | 0.050     | 0.167     | 3.892                | 2.89                   |
| Chlorogenic acid      | 0.75-120           | $y = 37088x - 53084$            | 0.9992         | 0.084     | 0.281     | 5.08                 | 5.34                   |
| Syringic acid         | 0.5-100            | $y = 45154.2555x - 19290.0310$  | 0.9998         | 0.081     | 0.270     | 5.81                 | 5.01                   |
| Ethylgallate          | 0.5-100            | $y = 43307.1523x + 2133.0116$   | 0.9997         | 0.075     | 0.250     | 5.68                 | 4.30                   |
| (-)Epicatechin        | 0.7-110            | $y = 8995.0663x - 8543.3500$    | 0.9993         | 0.075     | 0.251     | 4.90                 | 4.05                   |
| Ferulic acid          | 0.5-100            | $y = 76190.7484x - 15485.2230$  | 0.9999         | 0.062     | 0.205     | 4.72                 | 3.50                   |
| Coumaric acid         | 0.5-100            | $y = 101919.0398x - 19710.9815$ | 0.9998         | 0.033     | 0.097     | 1.81                 | 1.49                   |
| Eriocetrin            | 0.5-100            | $y = 22104.7983x - 5509.6099$   | 0.9997         | 0.040     | 0.096     | 1.39                 | 4.19                   |
| Neeriocitrin          | 0.5-100            | $y = 21193.8726x - 8292.7441$   | 0.9998         | 0.043     | 0.086     | 1.66                 | 2.13                   |
| Rutin                 | 0.7-110            | $y = 26417.8491x - 27143.8067$  | 0.9993         | 0.048     | 0.159     | 3.40                 | 3.79                   |
| Narirutin             | 0.5-100            | $y = 22293x + 2686.4$           | 0.9995         | 0.106     | 0.355     | 4.78                 | 5.53                   |
| Naringin              | 0.7-110            | $y = 23180.1541x - 18258.1645$  | 0.9994         | 0.034     | 0.081     | 1.71                 | 6.00                   |
| Myricetin             | 0.5-100            | $y = 44789.0025x - 37079.9968$  | 0.9997         | 0.057     | 0.190     | 6.38                 | 5.41                   |
| Hesperidin            | 0.5-100            | $y = 61439.7309x - 25498.1206$  | 0.9998         | 0.053     | 0.175     | 1.24                 | 2.56                   |
| Diosmin               | 0.5-100            | $y = 4214.8056x + 1093.5404$    | 0.9987         | 0.077     | 0.255     | 1.19                 | 1.24                   |
| Neohesperidin         | 0.5-100            | $y = 10709.8118x + 3447.8446$   | 0.9993         | 0.032     | 0.106     | 1.36                 | 1.65                   |
| Neodiosmin            | 0.5-100            | $y = 22188.5733x - 11478.9917$  | 0.9996         | 0.039     | 0.083     | 1.45                 | 4.38                   |
| Naringenin            | 0.5-100            | $y = 36851.3110x - 17639.1841$  | 0.9997         | 0.033     | 0.077     | 1.69                 | 3.69                   |
| Apigenin              | 0.5-100            | $y = 68168.9349x - 21240.6742$  | 0.9994         | 0.036     | 0.120     | 2.81                 | 3.23                   |
| Kampferol             | 0.5-100            | $y = 35708.4046x - 8738.4609$   | 0.9997         | 0.051     | 0.171     | 5.41                 | 3.82                   |
| Hesperetin            | 0.5-100            | $y = 25158.0962x - 8615.2595$   | 0.9999         | 0.040     | 0.107     | 1.22                 | 2.39                   |
| Isorhamnetin          | 0.5-100            | $y = 44346.4593x - 26794.1428$  | 0.9997         | 0.028     | 0.093     | 2.45                 | 3.98                   |
| Rhamnetin             | 0.5-100            | $y = 41523x - 22496$            | 0.9995         | 0.048     | 0.159     | 5.10                 | 4.15                   |
| Sinensetin            | 0.5-100            | $y = 52911.3069x - 17330.2806$  | 0.9995         | 0.029     | 0.076     | 1.01                 | 0.99                   |
| Nobiletin             | 0.5-100            | $y = 48288.0608x - 24771.5556$  | 0.9995         | 0.038     | 0.078     | 1.21                 | 2.52                   |
| Tangeretin            | 0.5-100            | $y = 63271x - 8409.3$           | 0.9995         | 0.050     | 0.110     | 0.67                 | 2.02                   |

**Table S2** Retention time, instrumental recovery and percentage relative standard deviation of polyphenols

| Compounds             | ±SD   | RSD%  | Recovery (%) | Compounds      | ±SD   | RSD%  | Recovery (%) |
|-----------------------|-------|-------|--------------|----------------|-------|-------|--------------|
| Coumaric acid         | 0.008 | 0.496 | 102.1        | Neeriocitrin   | 0.011 | 0.772 | 95.1         |
| 4-Hydroxybenzoic acid | 0.014 | 1.310 | 103.8        | Hesperetin     | 0.018 | 0.246 | 96.0         |
| Caffeic acid          | 0.011 | 0.601 | 102.0        | (-)Epicatechin | 0.013 | 0.868 | 93.9         |
| Ethylgallate          | 0.020 | 1.396 | 102.7        | Eriocetrin     | 0.015 | 0.657 | 97.0         |
| Ferulic acid          | 0.007 | 0.258 | 101.9        | Isorhamnetin   | 0.019 | 1.357 | 95.6         |
| Gallic acid           | 0.012 | 0.208 | 94.6         | Myricetin      | 0.019 | 1.066 | 95.0         |
| Kampferol             | 0.014 | 0.767 | 100.8        | Neohesperidin  | 0.042 | 0.604 | 100.8        |

|                     |       |       |       |                  |       |       |       |
|---------------------|-------|-------|-------|------------------|-------|-------|-------|
| Naringin            | 0.010 | 0.358 | 93.2  | Diosmin          | 0.011 | 2.077 | 86.9  |
| Protocatechuic acid | 0.009 | 0.769 | 102.3 | Narirutin        | 0.016 | 0.931 | 105.1 |
| Rutin               | 0.012 | 0.668 | 93.2  | Rhamnetin        | 0.008 | 0.368 | 102.3 |
| Syringic acid       | 0.008 | 0.283 | 97.3  | Tangeretin       | 0.019 | 0.964 | 104.4 |
| Vanillic acid       | 0.015 | 1.172 | 95.9  | Apigenin         | 0.009 | 0.655 | 102.8 |
| Hesperidin          | 0.007 | 0.321 | 95.8  | Chlorogenic acid | 0.015 | 0.837 | 95.9  |
| Sinensetin          | 0.006 | 0.385 | 108.2 | Nobiletin        | 0.006 | 0.077 | 99.7  |
| Neodiosmin          | 0.014 | 0.356 | 95.5  | Naringenin       | 0.011 | 0.101 | 99.6  |

**Table S3** Separation scheme of the bitter acids contained in the analyzed standards

| Peak | ICE-4                   | ICS-T3                               | ICS-H2                             | ICS-I4              | ICS-R3                  | Rt     |
|------|-------------------------|--------------------------------------|------------------------------------|---------------------|-------------------------|--------|
| 1    |                         |                                      |                                    | trans-Isohumulone   |                         | 25.044 |
| 2    |                         | trans-Tetrahydroiso,<br>Cohumulone   | cis-Hexahydroiso<br>cohumulone (1) | trans-Isocohumulone | cis-Q-<br>Isocohumulone | 25.119 |
| 3    |                         |                                      |                                    |                     | cis-Q-Isocohumulone     | 25.715 |
| 4    | Adlupulone,<br>Lupulone |                                      |                                    |                     |                         | 25.853 |
| 5    |                         | cis-Tetrahydroiso,<br>Cohumulone     |                                    |                     |                         | 26.175 |
| 6    |                         |                                      |                                    | trans-Isodhumulone  | cis-Q-<br>Isodhumulone  | 26.380 |
| 7    | Cohumulone              |                                      | cis-Hexahydroiso<br>cohumulone (2) |                     |                         | 26.489 |
| 8    |                         |                                      | cis-Hexahydroiso Humulone          |                     |                         | 26.752 |
| 9    |                         | trans-Tetrahydroiso,<br>Humulone     |                                    |                     |                         | 27.205 |
| 10   |                         |                                      | cis-Hexahydroiso<br>adhumulone     |                     |                         | 27.491 |
| 11   |                         | cis-Tetrahydroiso,<br>Humulone       |                                    |                     |                         | 27.596 |
| 12   | Adhumulone,<br>Humulone |                                      |                                    |                     |                         | 27.625 |
| 13   | Colupulone              |                                      |                                    |                     |                         | 27.813 |
| 14   |                         | cis-trans-Tetrahydro<br>isodhumulone |                                    |                     |                         | 28.302 |

**Table S4** Equation of calibration curves in solvent and in matrix and matrix effect value (ME%)

|                              | Equation Standard           | Blond beer equation          | Dark beer equation             | ME%<br>Blond | ME%<br>Dark |
|------------------------------|-----------------------------|------------------------------|--------------------------------|--------------|-------------|
| <b>4-Hydroxybenzoic acid</b> | $y = 66.976.58x + 8.897.48$ | $y = 60344.72x + 122.895.95$ | $y = 56794.11x + 2.832.079.45$ | 90.1%        | 84.8%       |
| <b>Tangeretin</b>            | $y = 63.271.42x - 8.409.31$ | $y = 57862.28x - 81.582.57$  | $y = 52817.02x - 45.756.09$    | 91.5%        | 83.5%       |

**Table S5** Retention time of polyphenols and ICE-4 standard containing  $\alpha$ - $\beta$ -acids

| N  | Compounds             | Rt     | N  | Compounds            | Rt     |
|----|-----------------------|--------|----|----------------------|--------|
| 1  | Gallic acid           | 1.07   | 18 | Hesperidin           | 14.531 |
| 2  | Protocatechuic acid   | 2.157  | 19 | Diosmin              | 14.864 |
| 3  | 4-Hydroxybenzoic acid | 4.06   | 20 | Neohesperidin        | 14.925 |
| 4  | Vanillic acid         | 7.344  | 21 | Neodiosmin           | 15.191 |
| 5  | Caffeic acid          | 7.751  | 22 | Naringenin           | 17.644 |
| 6  | Chlorogenic acid      | 8.637  | 23 | Apigenin             | 18.489 |
| 7  | Syringic acid         | 8.996  | 24 | Kampferol            | 18.551 |
| 8  | Ethylgallate          | 9.836  | 25 | Hesperetin           | 18.558 |
| 9  | (-)Epicatechin        | 9.88   | 26 | Isorhamnetin         | 19.087 |
| 10 | Ferulic acid          | 11.323 | 27 | Rhamnetin            | 20.826 |
| 11 | Coumaric acid         | 12.396 | 28 | Sinensetin           | 21.488 |
| 12 | Eriocetrin            | 12.597 | 29 | Nobiletin            | 22.432 |
| 13 | Neoeriocitrin         | 12.986 | 30 | Tangeretin           | 23.29  |
| 14 | Rutin                 | 13.01  | 31 | Adlupulone+ Lupulone | 25.853 |
| 15 | Narirutin             | 13.721 | 32 | Cohumulone           | 26.489 |
| 16 | Naringin              | 14.125 | 33 | Adhumulone+ Humulone | 27.625 |
| 17 | Myricetin             | 14.332 | 34 | Colupulone           | 27.813 |
